# Supplementary material for: Exogenous 24-Epibrassinolide Enhanced Drought Tolerance and Promoted BRASSINOSTEROID-INSENSITIVE2 Expression of Quinoa
Source: MDPI journal article supplement (doi:10.3390/plants13060873), 2024-03-18
Supplement: s1 [file s1]

## Supplementary Materials

**Table S1.** Primers sequences for RT-qPCR.

| Gene name       |   | Primers sequences         |
|-----------------|---|---------------------------|
| <i>CqBIN2</i>   | F | GTGATGGCTTGGCTGAGAGGTG    |
|                 | R | CGGTCGGAGATTGGAAGTAGAGTC  |
| <i>CqP5CS1</i>  | F | AATGCCTAATACTCCTGCTGCTGTG |
|                 | R | GCCTTGCCAACTGCTCCAAATAATC |
| <i>CqP5CS2</i>  | F | AATGCCTAATACTCCTGCTGCTGTG |
|                 | R | GCTCGCCATCCTCTTCAGTTGC    |
| <i>CqProDH1</i> | F | AAGTTGGCTGCTTCACTAGGGTTTG |
|                 | R | CGACATTATGGGTGGCAAGGACTG  |
| <i>CqProDH2</i> | F | ATTGGCTGCTTCACTTGGGTATGAG |
|                 | R | CGACATTATGGGTGGCAAGGACTG  |
| <i>CqOAT</i>    | F | AGCCTACCCACAACACAATCATAAG |
|                 | R | CTTCAGACAGTGCCTTGTTCC     |
| <i>CqMON1</i>   | F | GTATTGGTGGTCCTTGTTG       |
|                 | R | CTGCTGTGGTGTATTGATT       |

**Table S2.** Primers sequences for BSMV-VIGS.

| Gene name     |   | Primers sequences                   |
|---------------|---|-------------------------------------|
| <i>CqBIN2</i> | F | TAGAAGGCCTCCATGATGGAGCAAGGGGTTTCCTC |
|               | R | GAGACGCGTGAGCTCAAGCTGCTCAACTTCAGCGT |

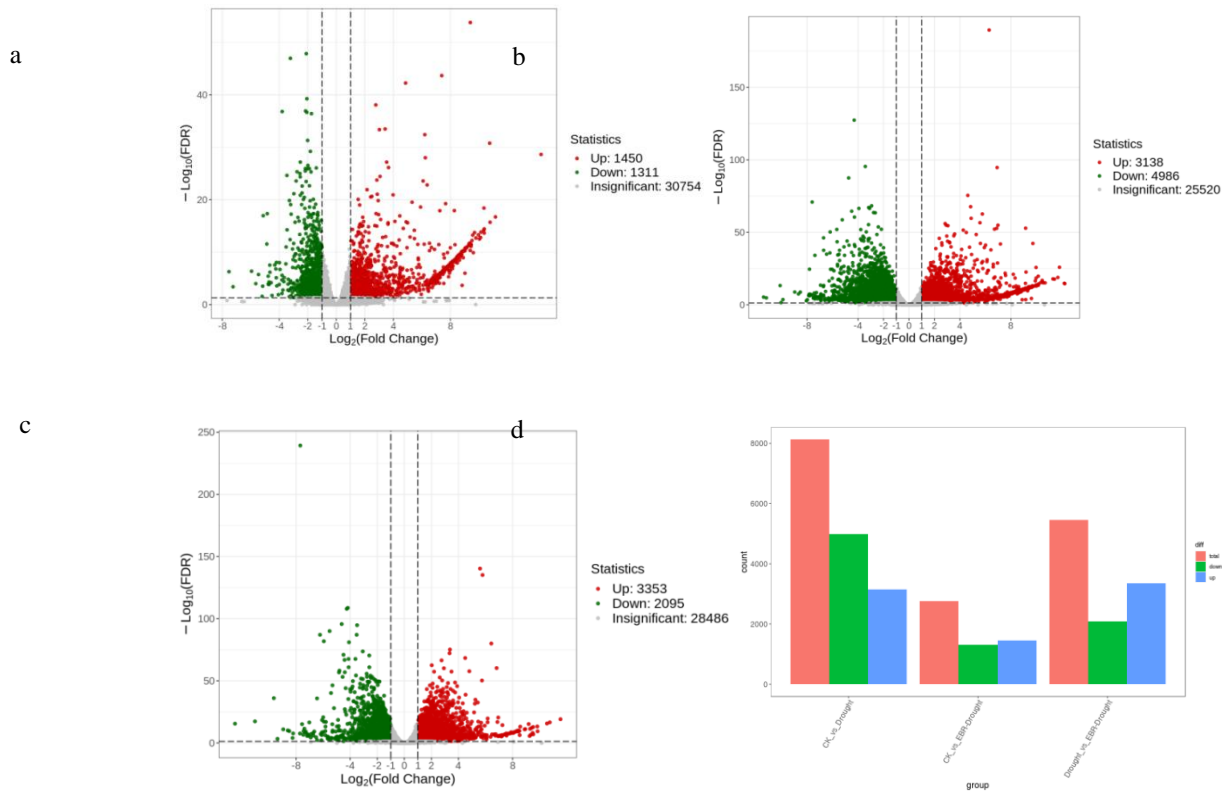

**Figure S1.** The diagram of differential gene volcano and differential gene statistics (a): CK and Drought; (b): CK and EBR + Drought; (c): Drought and EBR + Drought; (d): Differential gene statistics chart.

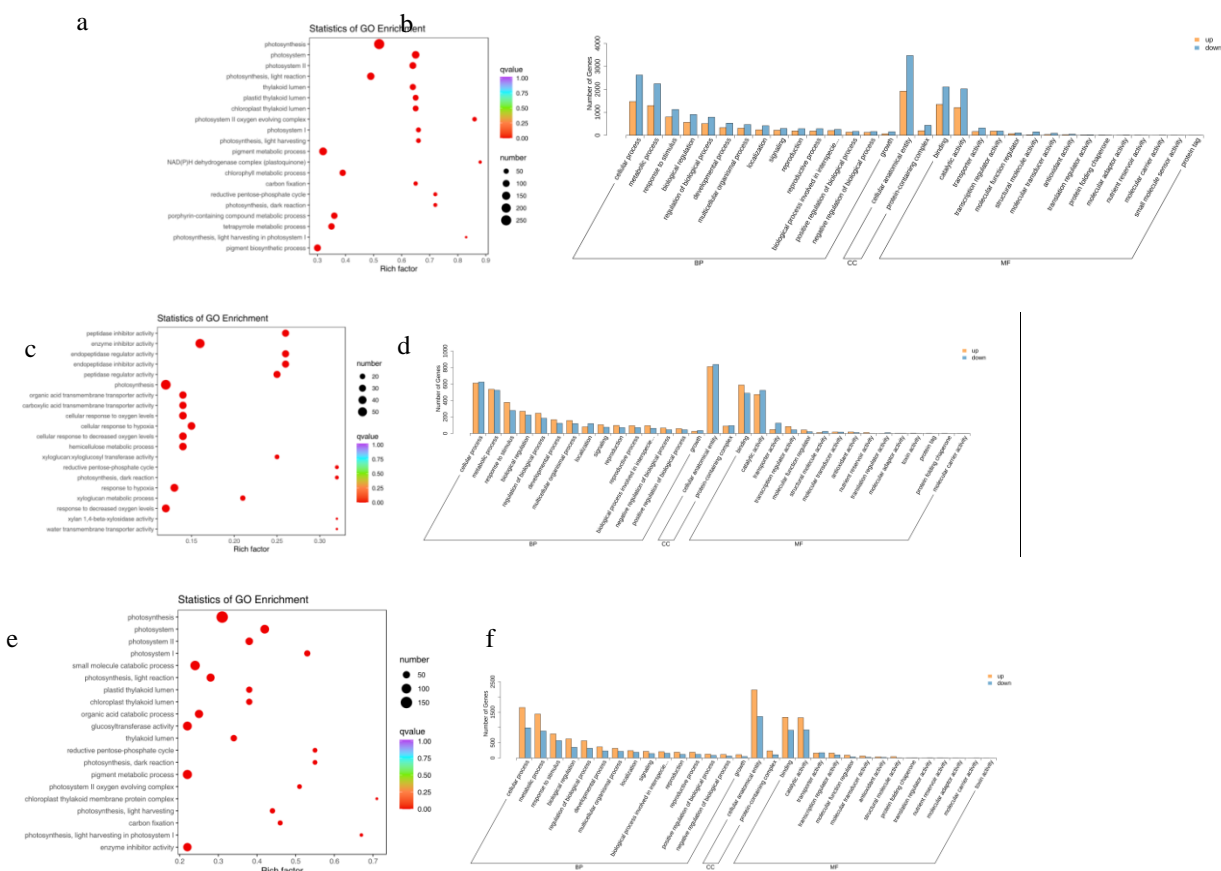

**Figure S2.** 2 GO enrichment scatter plot and Go classification histogram of DEGs (a, b): CK and Drought; (c, d): CK and EBR + Drought; (e, f): Drought and EBR + Drought.
